# Supplementary material
Source: PubMed Central journal article supplement (PMC6112710)
Supplement: pnas.1808966115.sapp.pdf [file pnas.1808966115.sapp.pdf]

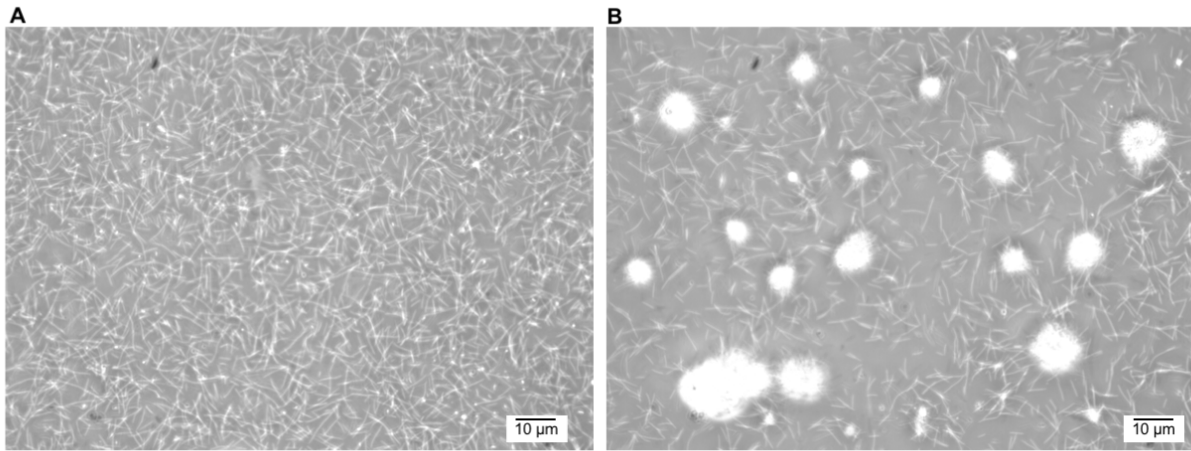

**Figure S1:** *F. johnsoniae* SprB antibody causes aggregation of *C. gingivalis* cells. **(A)** *C. gingivalis* cells with no antibody **(B)** *C. gingivalis* cells with anti-SprB antibody. Experiments done at room temperature.

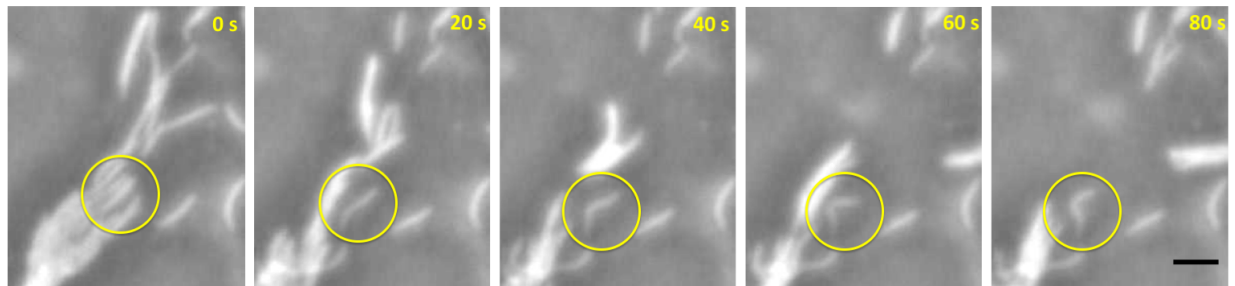

**Figure S2:** Images showing one stuck and bent cell (marked by a yellow circle) within a small group (slug) of *C. gingivalis*. Experiments done at room temperature. Scale bar represents 5 µm.

## Supplementary Movies

**Movie S1.** Gliding of single *C. gingivalis* cells over a glass surface.

**Movie S2.** *C. gingivalis* cell tethered to a glass surface and rotating about a fixed axis.

**Movie S3.** A swarm of *C. gingivalis* moving in a circular fashion with layers on top of one another. Gas bubbles (bright white spheres) move along the top layer of the swarm. A less dense region with small mobile aggregates is seen near the center of the swarm.

**Movie S4.** Fluorescently-labeled *C. gingivalis* cells in a swarm containing both labeled and unlabeled *C. gingivalis* cells.

**Movie S5.** Motion of slugs found near the edge of a swarm.

**Movie S6.** *P. oris* transported as cargo along the length of a single *C. gingivalis* cell.

**Movie S7.** *F. nucleatum* transported as cargo along the length of a single *C. gingivalis* cell.

**Movie S8.** *P. micra* transported as cargo along the length of a single *C. gingivalis* cell.

**Movie S9.** *S. sanguinis* transported as cargo along the length of a single *C. gingivalis* cell.

**Movie S10.** *Actinomyces* sp. 169 transported as cargo along the length of a single *C. gingivalis* cell.

**Movie S11.** *V. parvula* transported as cargo along the length of a single *C. gingivalis* cell.

**Movie S12.** *P. endodontalis* transported as cargo along the length of a single *C. gingivalis* cell.

**Movie S13.** A polymicrobial community with seven non-motile fluorescent bacteria being moved by a *C. gingivalis* (grey) resolved via spectral imaging. See Fig. 5A for a color key.

**Movie S14.** Time-lapse images of a small region from Movie S13 shows that a polymicrobial aggregate of non-motile bacteria moves long distances in a swarm. For better contrast, *C. gingivalis* cells are represented in black while non-motile bacteria are represented by the color key shown in Fig. 5.
